# Supplementary material for: Silencing CaTPS1 Increases the Sensitivity to Low Temperature and Salt Stresses in Pepper
Source: MDPI journal article supplement (doi:10.3390/agronomy13020319), 2023-01-20
Supplement: s1 [file s1]

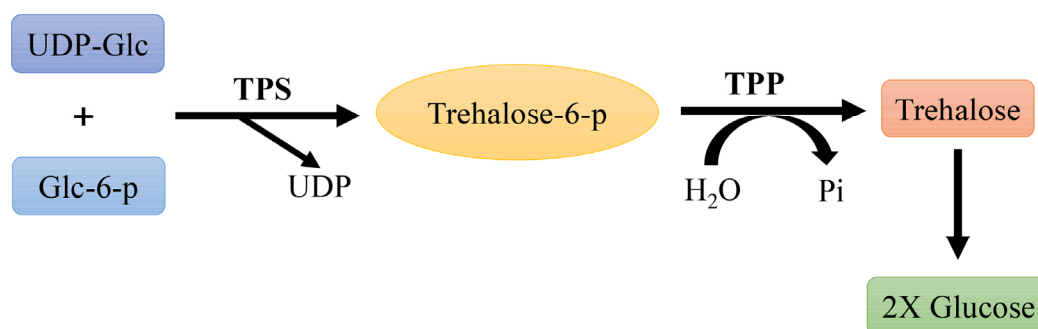

**Figure S1.** The main pathway of trehalose metabolism.

The ‘TPS-TPP’ pathway of trehalose metabolism involved two key enzymes, trehalose-6-phosphate synthase (TPS) and Trehalose phosphate phosphatase (TPP), and this process can be divided into two steps. Firstly, TPS catalyzes the substrate, uridine diphosphate-glucose (UDP-Glc) and glucose-6-phosphate (Glc-6-p), to synthesize Trehalose-6-phosphate (T6P). Secondly, T6P is dephosphorylated by TPP to form trehalose. However, trehalose is eventually hydrolyzed by trehalase into two molecules of glucose [1–5].

1. Gancedo, C.; Flores, C. L. The importance of a functional trehalose biosynthetic pathway for the life of yeasts and fungi. *FEMS Yeast Res* **2004**, *4* (4-5), 351-9.
2. Avonce, N.; Mendoza-Vargas, A.; Morett, E.; Iturriaga, G. Insights on the evolution of trehalose biosynthesis. *BMC Evol Biol* **2006**, *6*, 109.
3. Vandesteene, L.; Lopez-Galvis, L.; Vanneste, K.; Feil, R.; Maere, S.; Lammens, W.; Rolland, F.; Lunn, J. E.; Avonce, N.; Beeckman, T.; Van Dijck, P. Expansive evolution of the trehalose-6-phosphate phosphatase gene family in Arabidopsis. *Plant Physiol* **2012**, *160* (2), 884-96.
4. Pohane, A. A.; Carr, C. R.; Garhyan, J.; Swarts, B. M.; Siegrist, M. S. Trehalose Recycling Promotes Energy-Efficient Biosynthesis of the Mycobacterial Cell Envelope. *Mbio* **2021**, *12* (1).
5. Paul, M. J.; Oszvald, M.; Jesus, C.; Rajulu, C.; Griffiths, C. A. Increasing crop yield and resilience with trehalose 6-phosphate: targeting a feast-famine mechanism in cereals for better source-sink optimization. *J Exp Bot* **2017**, *68* (16), 4455-4462.
